# Supplementary material
Source: PubMed Central journal article supplement (PMC2690012)
Supplement: 0811422106_0811422106SI.pdf [file 0811422106_0811422106SI.pdf]

# Supporting Information

Levey et al. 10.1073/pnas.0811422106

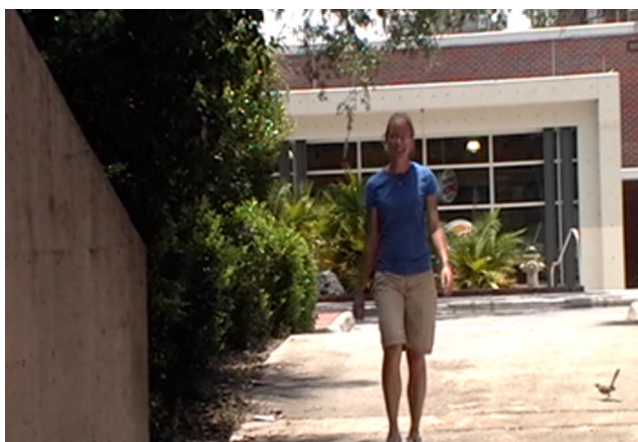

**Movie S1.** Video demonstrating individual recognition of humans by mockingbirds. Five humans are shown walking by a mockingbird nest, hidden in vegetation beside a sidewalk. One of these humans had previously visited the nest multiple times, as described in *Materials and Methods*. Mockingbirds attack the familiar human and ignore all others who passed the nest in identical fashion. The lack of response to the first 3 humans cannot be attributed to the mockingbirds' absence from the area, because throughout the video, the territorial pair of birds can be seen flying to and from the nest, and can be heard singing. The video is for demonstration; it does not replicate the experimental protocol used in the study.

[Movie S1 \(AVI\)](#)
